# Supplementary material
Source: MDPI journal article supplement (https://www.mdpi.com/2673-4591/37/1/42)
Supplement: s1 [file s1]

New hydrophobic deep eutectic solvent based on D2EHPA and TOPO: properties  
and application

Arina V. Kozhevnikova\*, Inna V. Zinov'eva, Nikita A. Milevskii, Yulia A.

Zakhodyaeva and Andrey A. Voshkin

*Kurnakov Institute of General and Inorganic Chemistry, Russian Academy of  
Sciences, Moscow, Russia*

\*E-mail: [ak@igic.ras.ru](mailto:ak@igic.ras.ru)

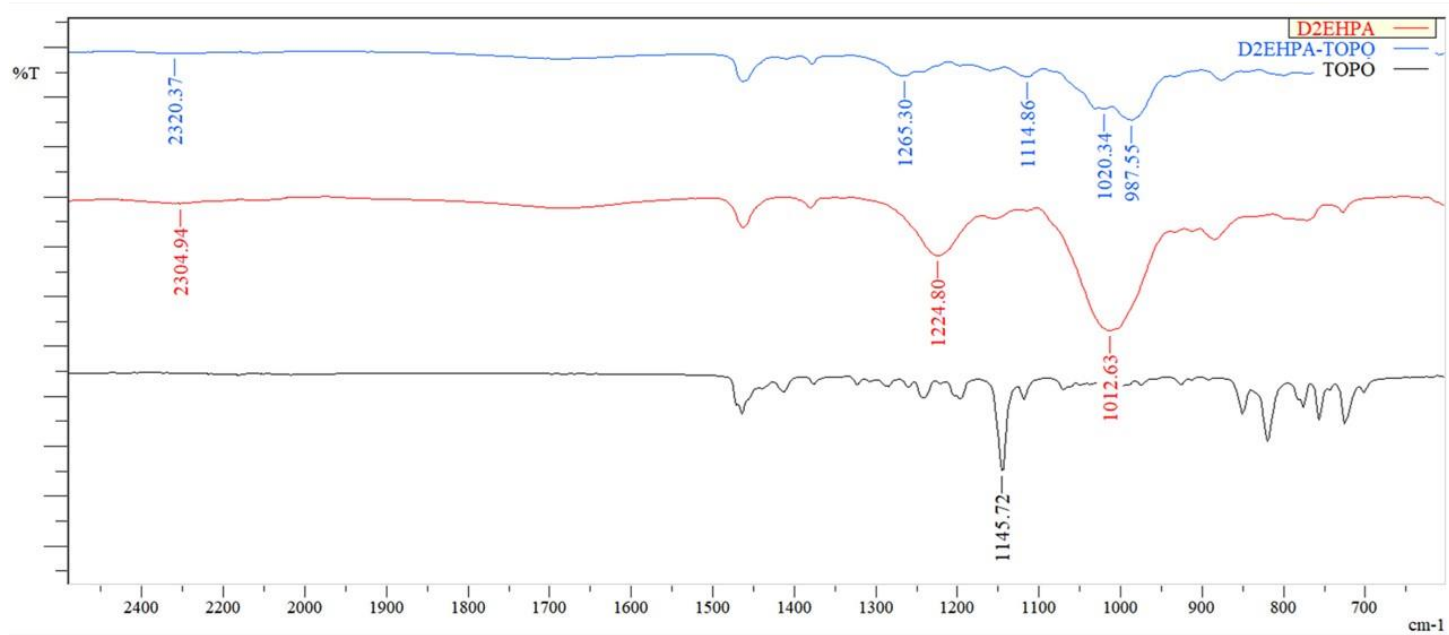

**Figure S1.** Infrared spectra of D2EHPA, HDES and TOPO.

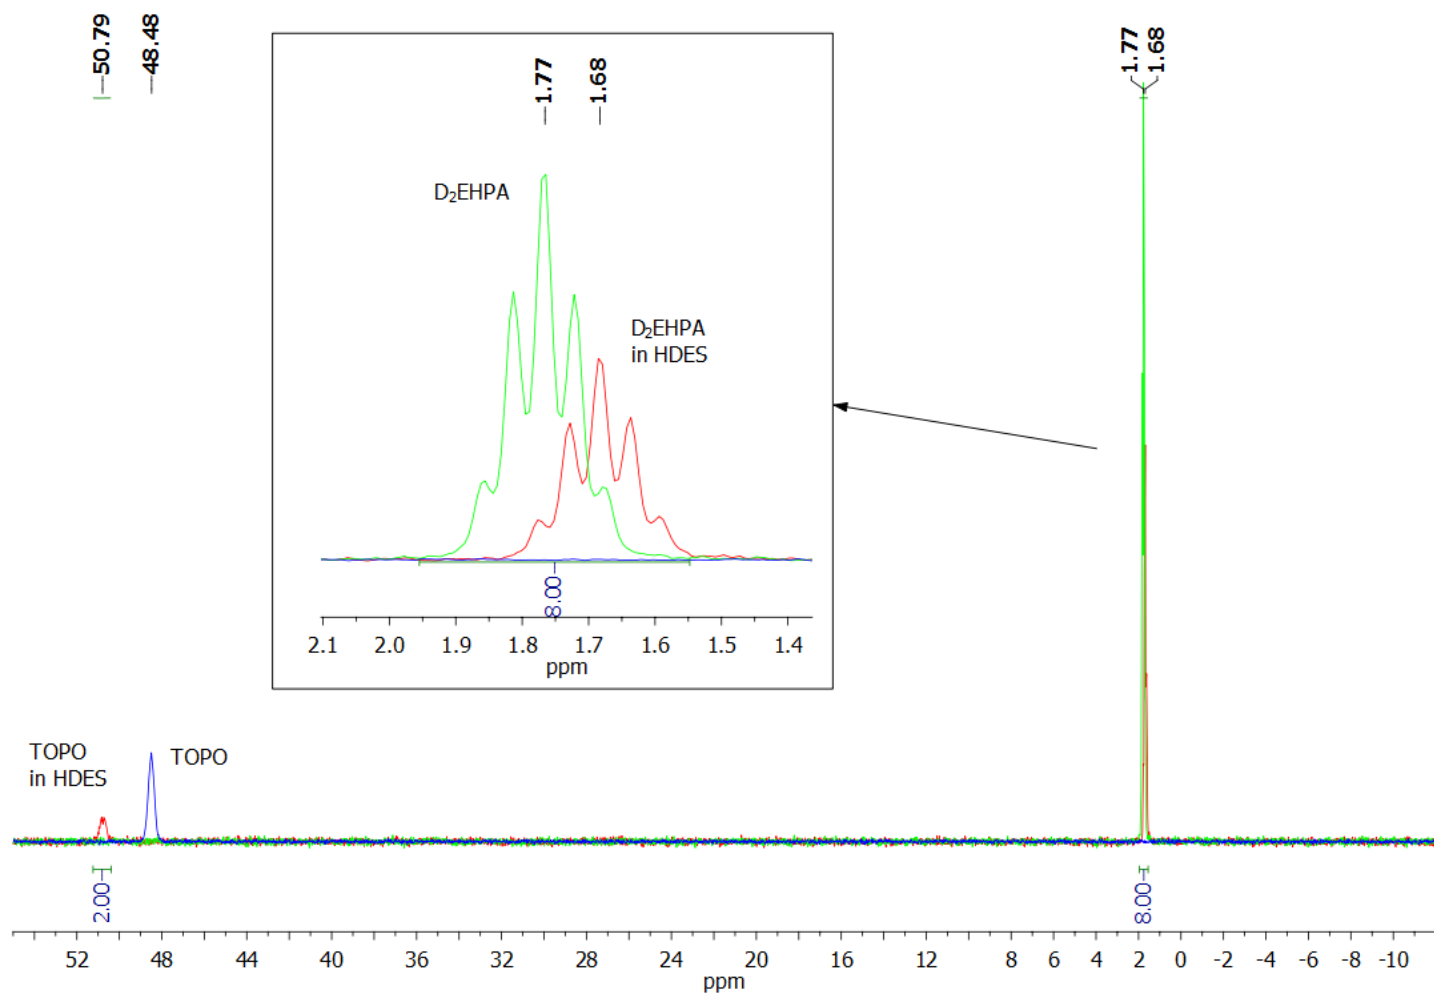

**Figure S2.**  $^{31}\text{P}$  NMR spectra of D<sub>2</sub>EHPA, HDES and TOPO.
